# Supplementary material for: Nanovesicles released by OKT3 hybridoma express fully active antibodies
Source: PubMed Central journal article supplement (PMC7801098; doi:10.1080/14756366.2020.1852401), 2021-01-06
Supplement: IENZ_A_1852401_SM7236.pdf [file IENZ_A_1852401_SM7236.pdf]

Supplemental material

NANOVESICLES RELEASED BY OKT3 HYBRIDOMA EXPRESS FULLY ACTIVE ANTIBODIES

Supplementary Figure 1

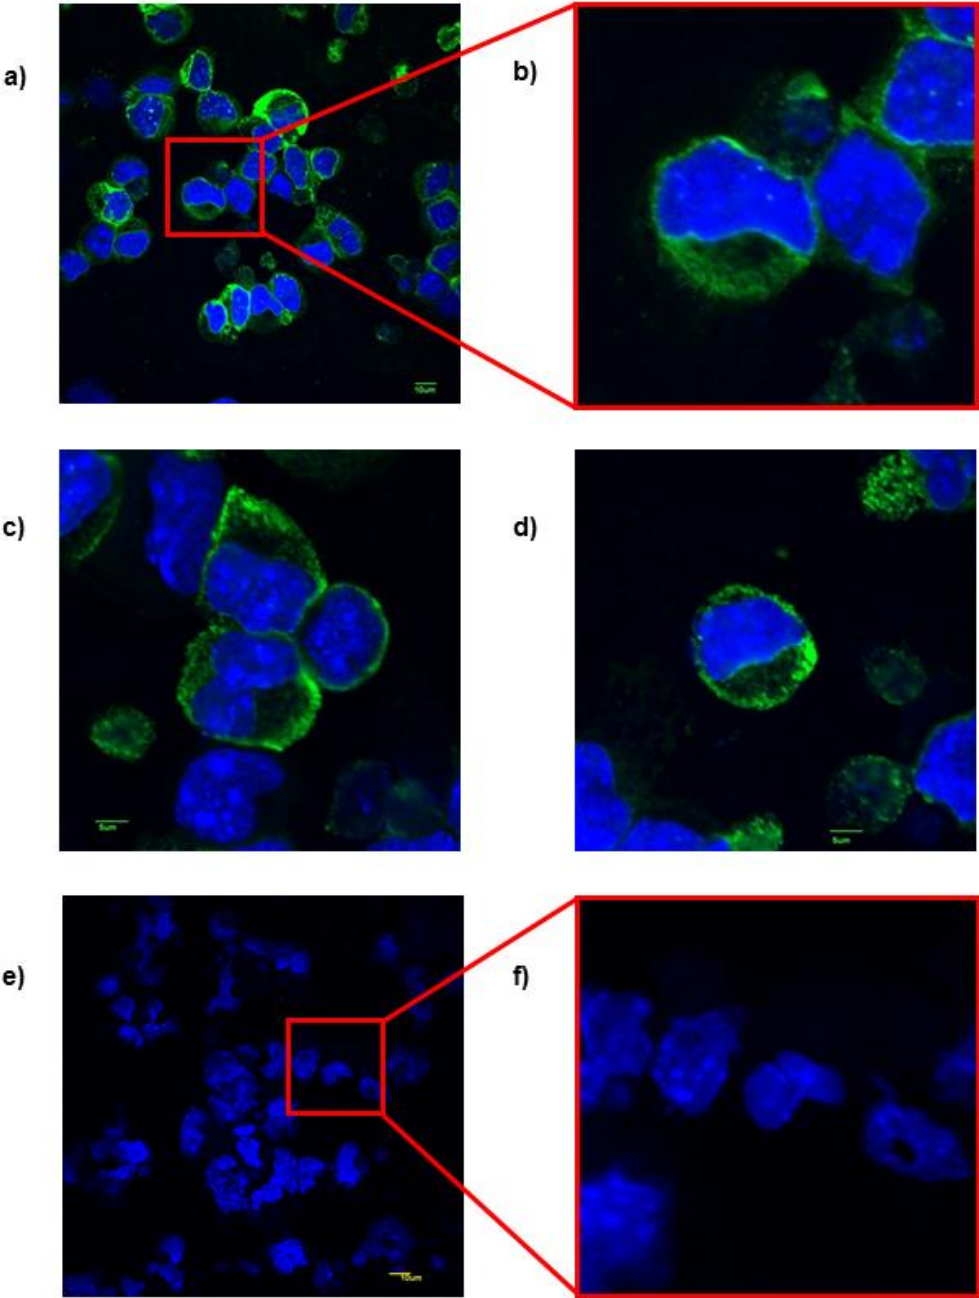

**Supplementary Figure 1. Laser scanning confocal microscopy (LSCM) of immunoglobulins expression in OKT3 and P3X63 cell lines**

OKT3 cell line showed a great expression of membrane-bound immunoglobulins (**a, b, c and d**), while P3X63, our negative control, did not show any expression of immunoglobulins (**e and f**)

## Supplementary Figure 2

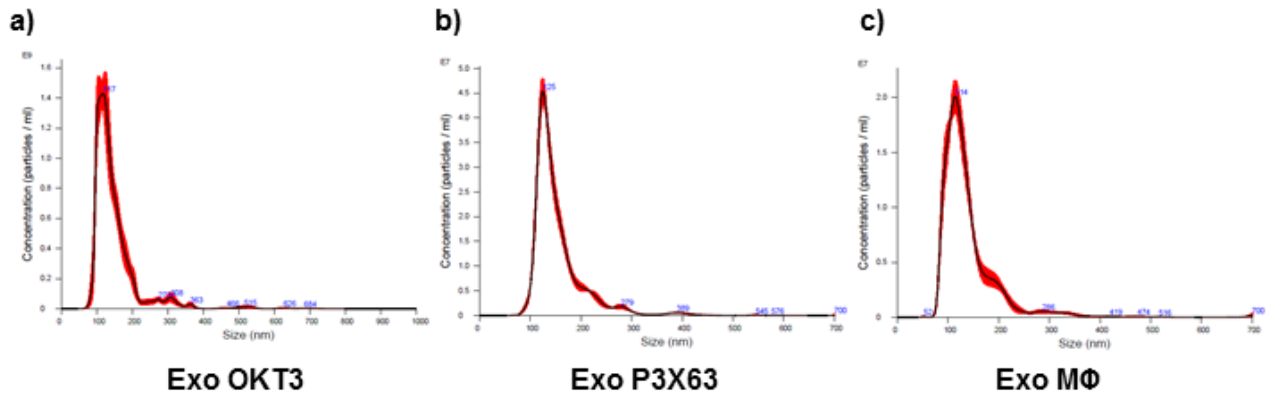

**Supplementary Figure 2. Characterization of exosomes samples isolated from OKT3, P3X63 and human primary macrophages by Nanoparticle Tracking Analysis**

Analysis of size and distribution of exosome derived from OKT3 hybridoma cell line (a), P3X63 (b) and Human Primary Macrophages (c) by Nanoparticle Tracking Analysis
